# Supplementary material for: Spatial location of neutralizing and non-neutralizing B cell epitopes on domain 1 of ricin toxin’s binding subunit
Source: PubMed Central journal article supplement (PMC5507285; doi:10.1371/journal.pone.0180999), 2017-07-10
Supplement: pone.0180999.s001.pdf [file pone.0180999.s001.pdf]

**S1 Table. LC5 Competition ELISA**

| mAb   | Target  | % Inhibition <sup>a</sup> |
|-------|---------|---------------------------|
| LC5   | RTB     | 82                        |
| SyIH3 | RTB     | 15                        |
| 24B11 | RTB     | <10                       |
| BJF9  | RTB     | <10                       |
| JB11  | RTB     | <10                       |
| JB4   | RTB     | <10                       |
| GD12  | RTA (4) | 16                        |
| JD4   | RTA (4) | <10                       |
| WECH1 | RTA (2) | <10                       |
| SyH7  | RTA (2) | <10                       |
| PA1   | RTA (2) | <10                       |
| IB2   | RTA (3) | <10                       |

<sup>a</sup>, % inhibition of LC5 capture of biotinylated ricin by various mAbs, as described in Materials and Methods.
