# Supplementary material for: Spatial location of neutralizing and non-neutralizing B cell epitopes on domain 1 of ricin toxin’s binding subunit
Source: PubMed Central journal article supplement (PMC5507285; doi:10.1371/journal.pone.0180999), 2017-07-10

S5 Figure

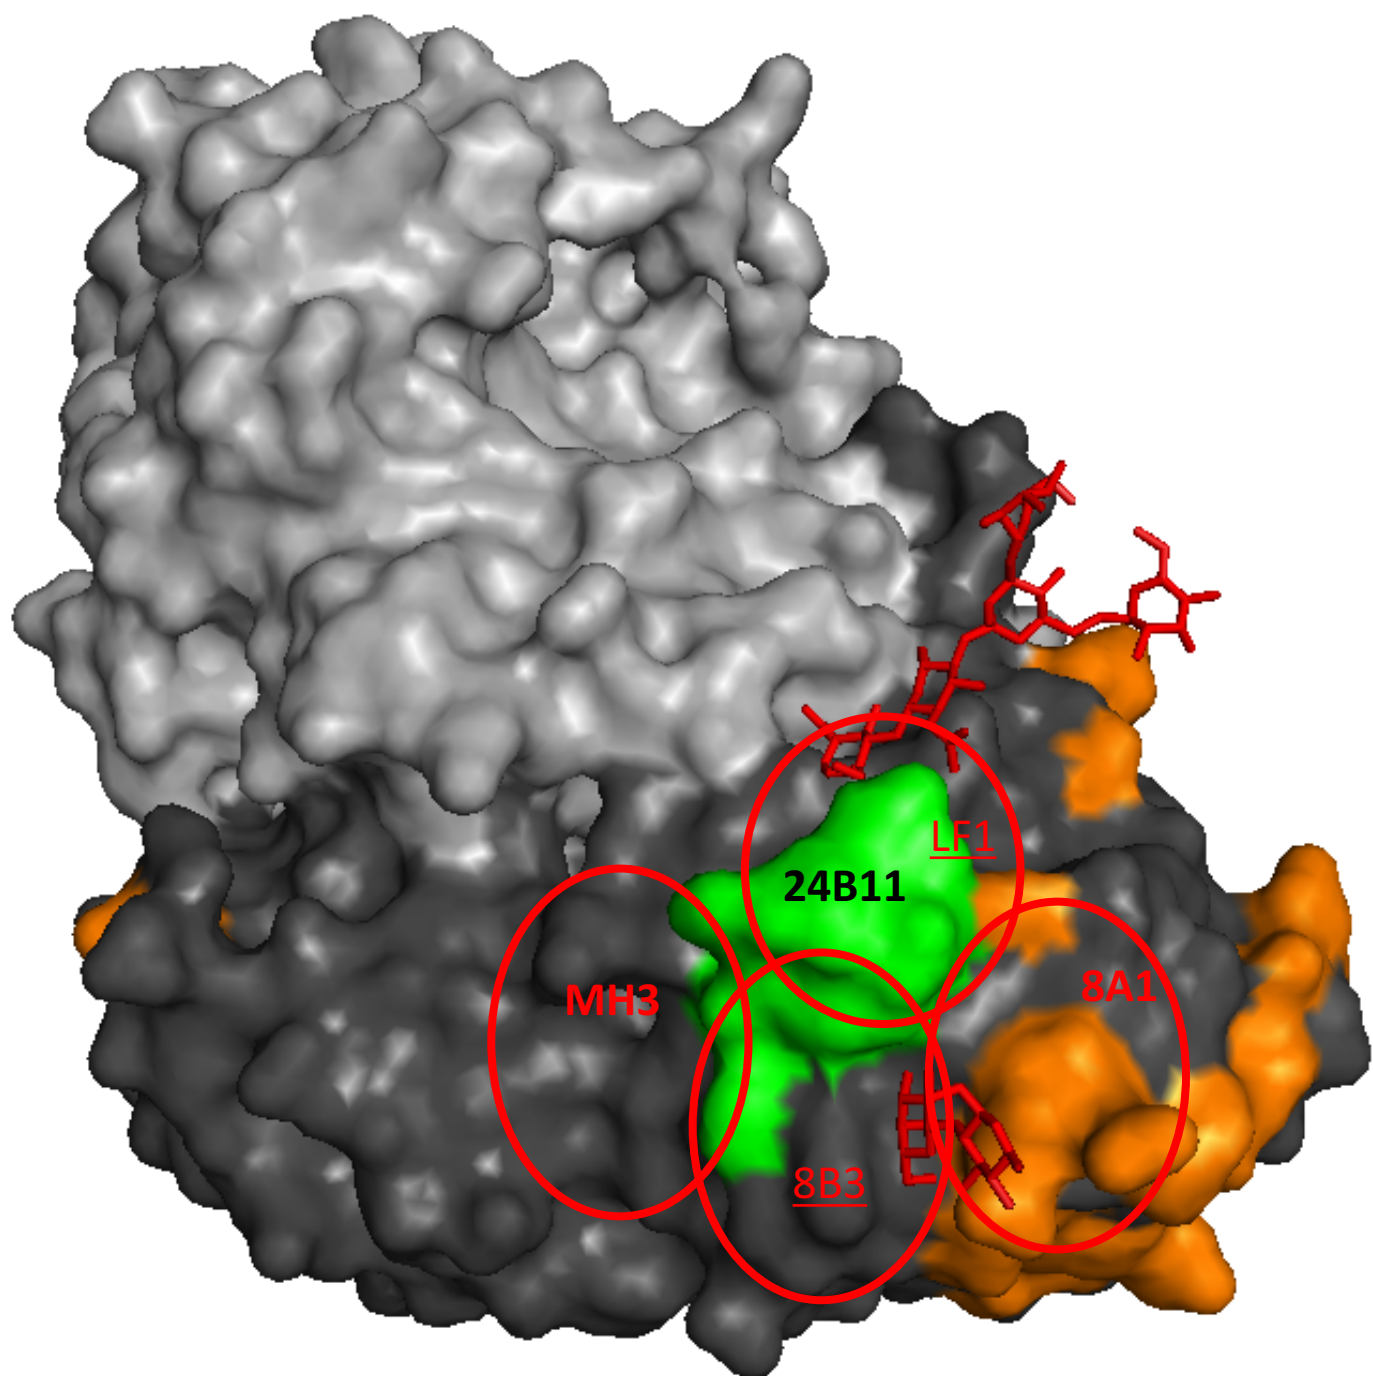

Supplement: pone.0180999.s006.pdf [file pone.0180999.s006.pdf]
