# Supplementary material for: Spatial location of neutralizing and non-neutralizing B cell epitopes on domain 1 of ricin toxin’s binding subunit
Source: PubMed Central journal article supplement (PMC5507285; doi:10.1371/journal.pone.0180999), 2017-07-10

# S6 Figure

A.

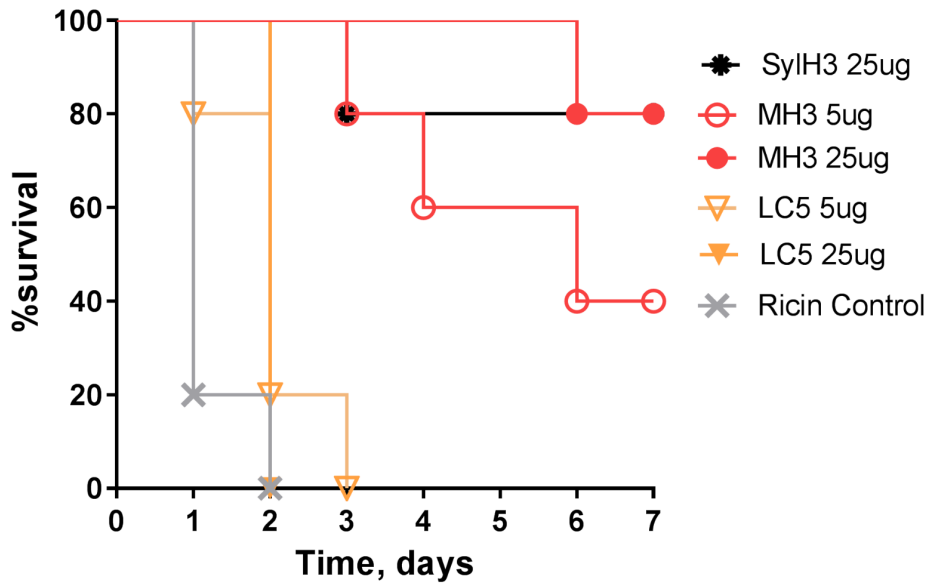

B.

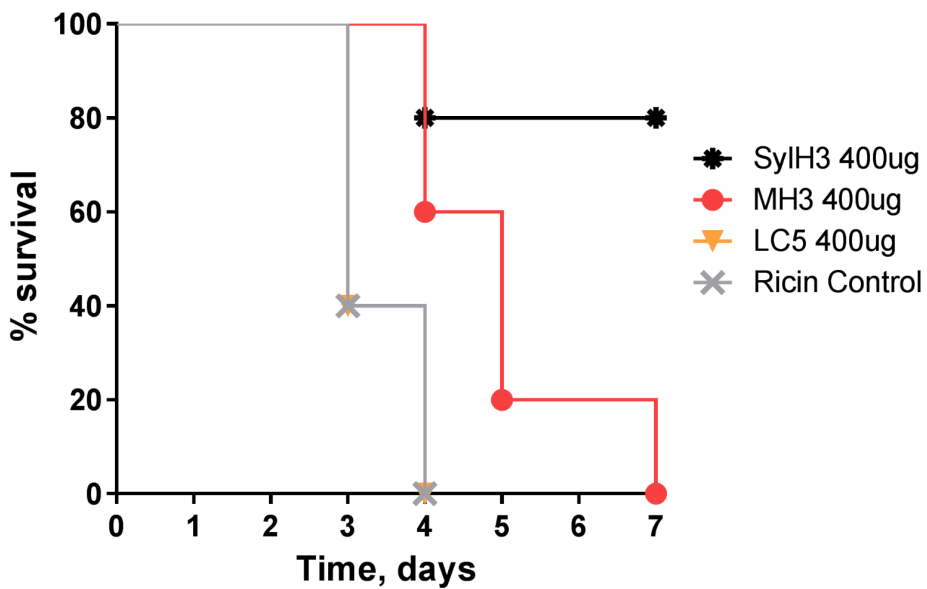

Supplement: pone.0180999.s007.pdf [file pone.0180999.s007.pdf]
