# Supplementary material for: Spatial location of neutralizing and non-neutralizing B cell epitopes on domain 1 of ricin toxin’s binding subunit
Source: PubMed Central journal article supplement (PMC5507285; doi:10.1371/journal.pone.0180999), 2017-07-10

A.

|                 |     |   |   |   |   |   |   |   |   |   |   |   |   |   |   |   |   |   |   |   |   |   |   |
|-----------------|-----|---|---|---|---|---|---|---|---|---|---|---|---|---|---|---|---|---|---|---|---|---|---|
|                 | AA  | * | * | * |   | * | * |   |   |   |   |   |   | * |   |   | * | * |   |   |   |   |   |
| RTB-1 $\alpha$  | 17  | N | G | L | C | V | D | V | R | D | G | R | F | H | N | G | N | A | I | Q | L | W | P |
| RCA1-1 $\alpha$ | 17  | N | G | L | C | V | D | V | T | G | E | E | F | F | D | G | N | P | I | Q | L | W | P |
| RTB-2 $\gamma$  | 229 | S | G | L | V | L | D | V | R | A | S | D | P | S | L | K | Q | - | I | I | L | Y | P |
| RCA1-2 $\gamma$ | 229 | N | G | L | V | L | D | V | R | R | S | D | P | S | L | K | Q | - | I | I | V | H | P |

  

|                 |  |   |   |   |   |   |   |   |   |   |   |   |   |   |   |   |   |   |   |   |   |    |     |
|-----------------|--|---|---|---|---|---|---|---|---|---|---|---|---|---|---|---|---|---|---|---|---|----|-----|
|                 |  |   |   |   |   | * | * |   |   |   |   |   |   |   |   |   |   |   |   |   |   | AA |     |
| RTB-1 $\alpha$  |  | C | K | S | N | T | D | A | N | Q | L | W | T | L | K | R | D | N | T | I | R | S  | 59  |
| RCA1-1 $\alpha$ |  | C | K | S | N | T | D | W | N | Q | L | W | T | L | R | K | D | S | T | I | R | S  | 59  |
| RTB-2 $\gamma$  |  | L | H | G | - | - | D | P | N | Q | I | W | L | P | L | F | - | - | - | - | - | -  | 262 |
| RCA1-2 $\gamma$ |  | F | H | G | - | - | N | L | N | Q | I | W | L | P | L | F | - | - | - | - | - | -  | 262 |

B. 1 $\alpha$

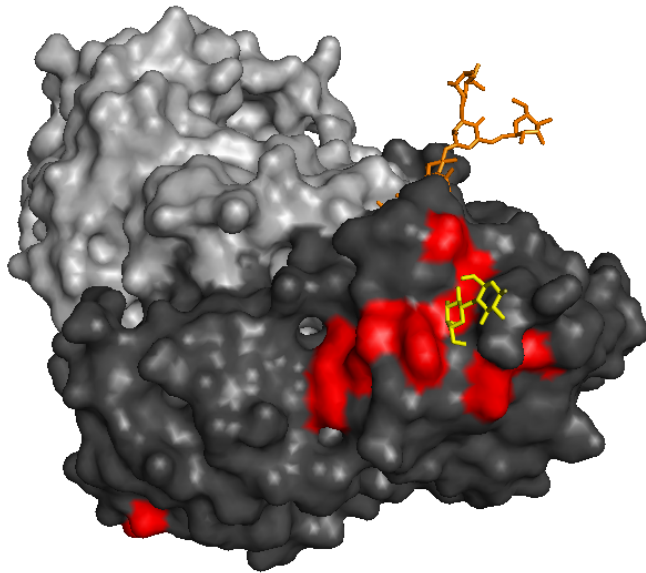

C. 2 $\gamma$

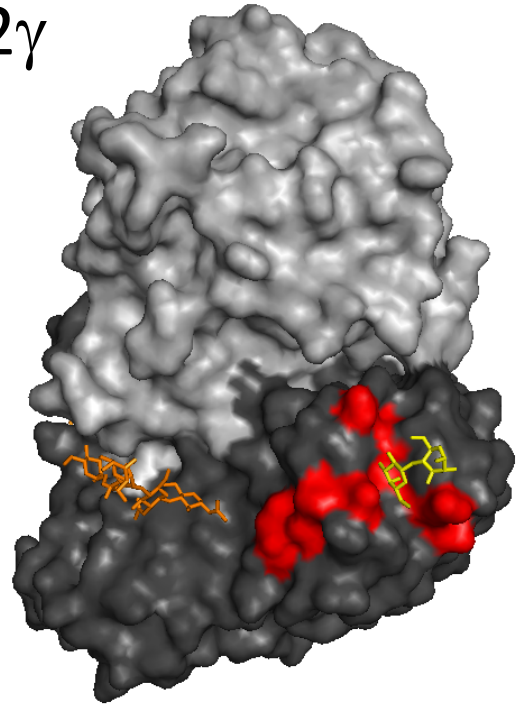

Supplement: pone.0180999.s008.pdf [file pone.0180999.s008.pdf]
